# Supplementary material
Source: PubMed Central journal article supplement (PMC2745655)

## SUPPLEMENTARY MATERIAL

Figure S1. Species distribution diagrams for  $\text{Ins}(1,3,4,5,6)P_5$  in the presence of  $\text{Na}^+$  excess, in 0.15 M  $\text{Me}_4\text{NCl}$ , and 37.0 °C.  $[\text{Ins}(1,3,4,5,6)P_5] = 1 \text{ mM}$ ,  $[\text{Na}^+] = 100 \text{ mM}$ .

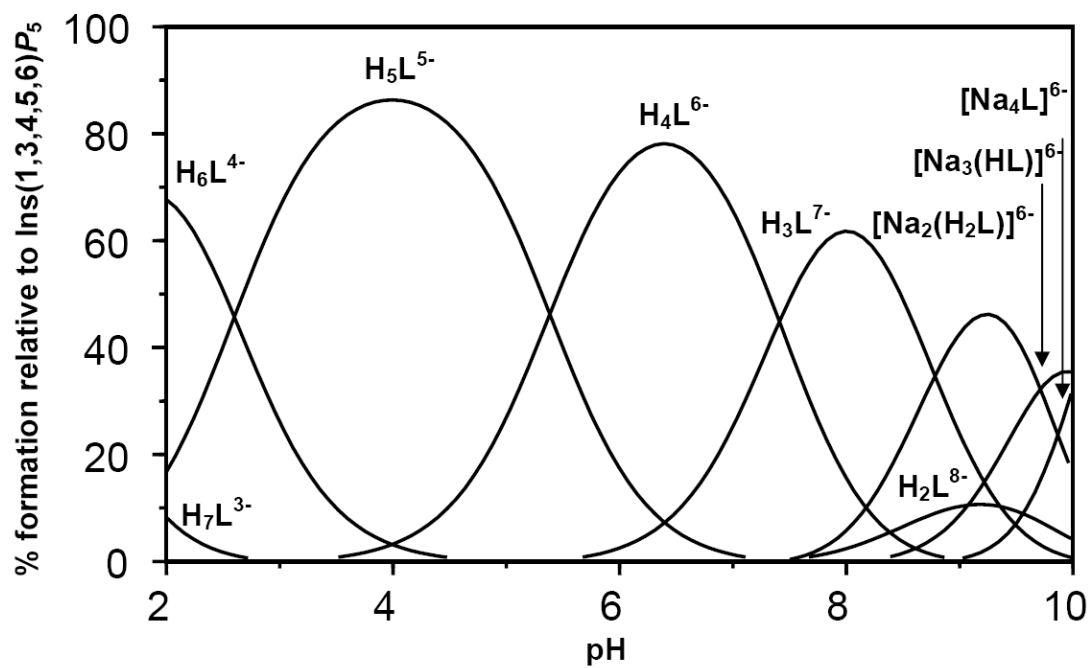

Figure S2. Species distribution diagram for  $\text{Ins}(1,3,4,5,6)\text{P}_5$  in the presence of  $\text{Cu}^{2+}$ , in 0.15 M  $\text{Me}_4\text{NCl}$  and 37.0 °C.  $[\text{Ins}(1,3,4,5,6)\text{P}_5] = 1 \text{ mM}$ ,  $[\text{Cu}^{2+}] = 1 \text{ mM}$ .

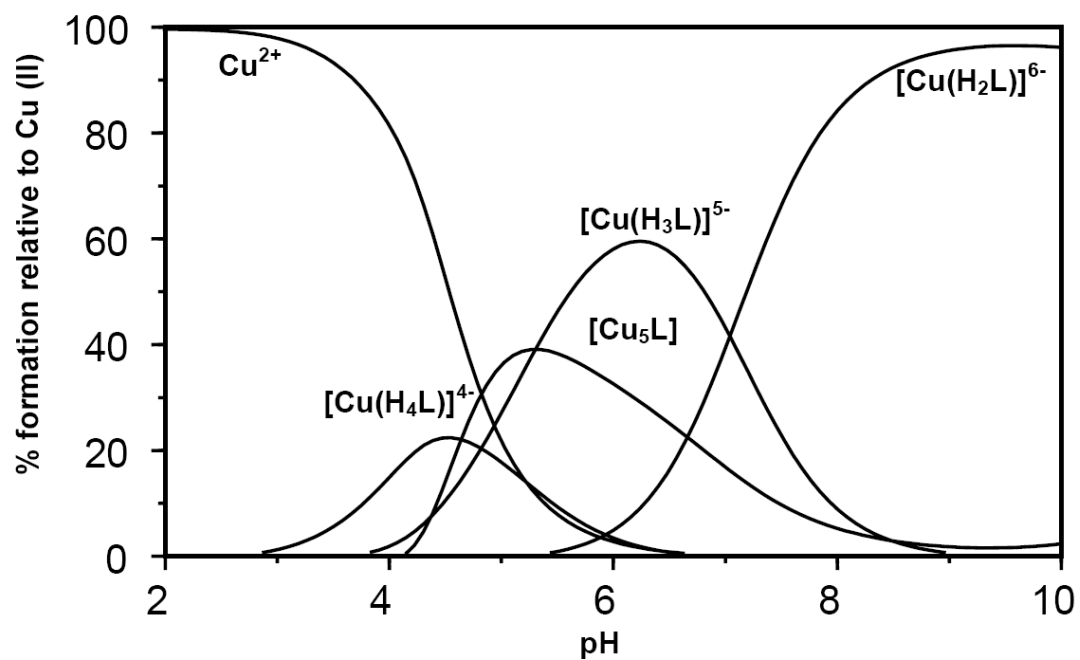

Figure S3. Species distribution diagram for Ins(1,3,4,5,6) $P_5$  in the presence of  $Fe^{2+}$ , in 0.15 M  $Me_4NCl$  and 37.0 °C.  $[Ins(1,3,4,5,6)P_5] = 1$  mM,  $[Fe^{2+}] = 1$  mM.

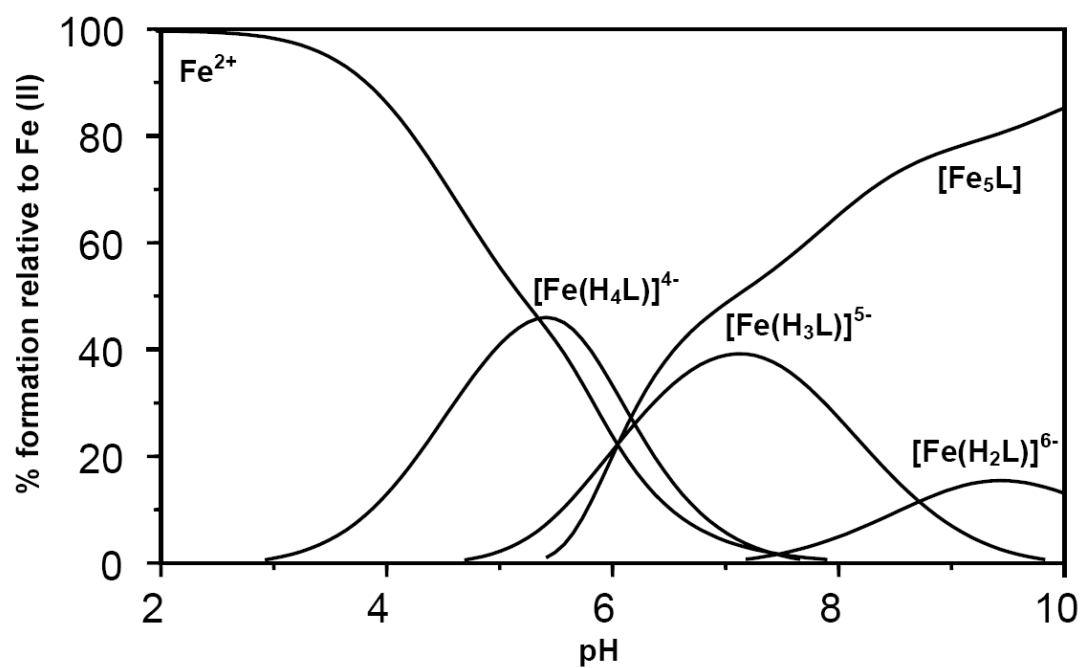

Figure S4. Comparative behaviour of  $\text{Ins}(1,2,3)P_3$ ,  $\text{Ins}(1,3,4,5,6)P_5$  and  $\text{Ins}P_6$ . Quotient between bound ligand to unbound ligand vs. pH in 0.15 M  $\text{Me}_4\text{NCl}$ , and 37.0 °C.  $[\text{Ins}P_x] = 1 \text{ mM}$ ,  $[\text{K}^+] = 100 \text{ mM}$ .

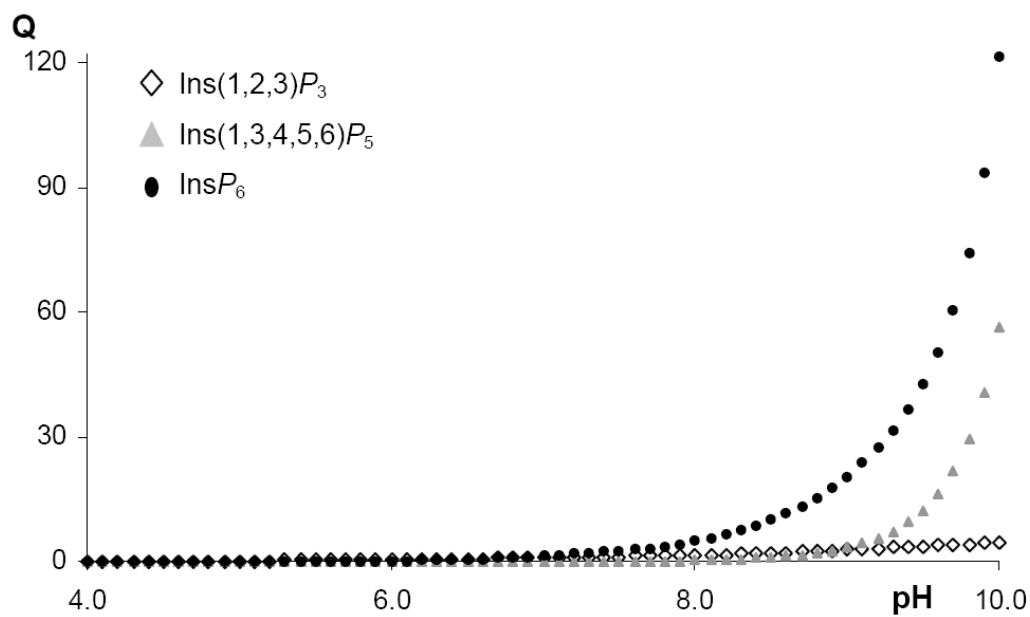

Supplement: 775_2009_510_MOESM1_ESM.pdf [file 775_2009_510_MOESM1_ESM.pdf]
